# Supplementary material for: Synthesis, cytotoxicity, DNA interaction and cell cycle studies of trans-diiodophosphine Pt(ii) complexes
Source: Royal Society of Chemistry journal article supplement (doi:10.1039/c4dt02392g), 2014-10-06
Supplement: c4dt02392g1.pdf [file c4dt02392g1.pdf]

**A) Stability studies of the *trans*-[PtI<sub>2</sub>(amine)(PPh<sub>3</sub>)] in DMSO solution**

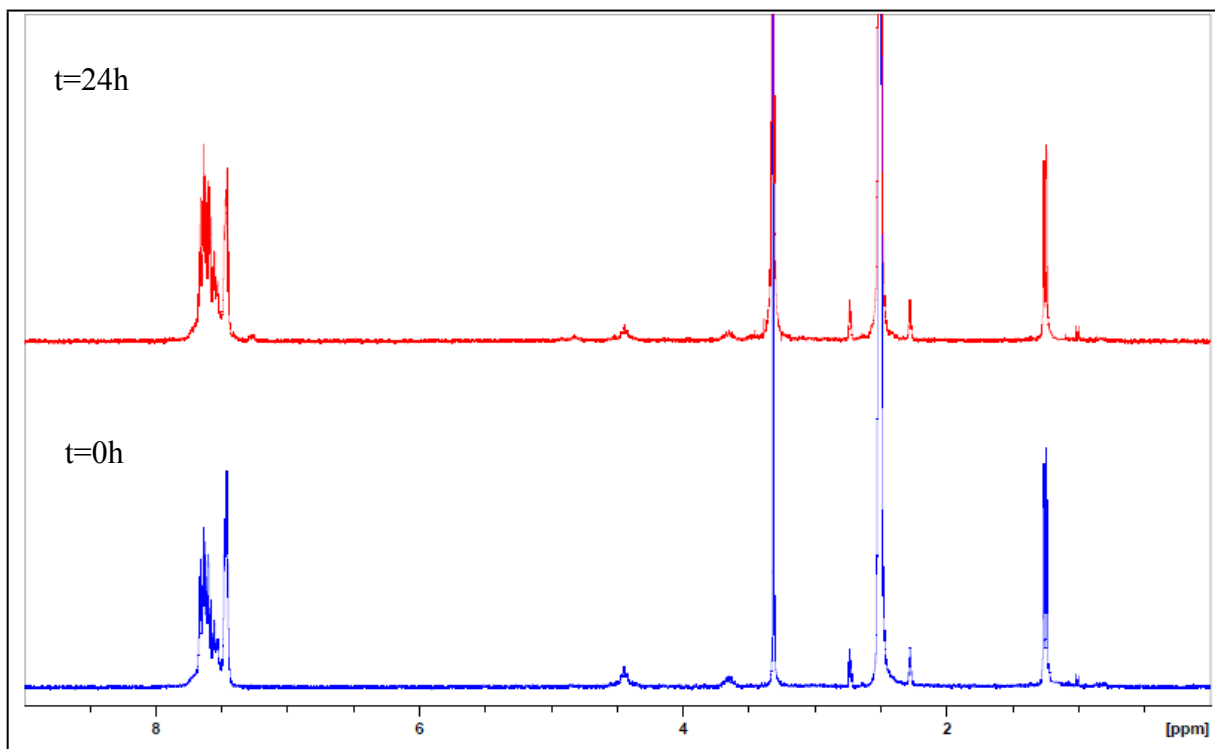

**Figure SM-A1. NMR spectra of the complex *trans*-[PtI<sub>2</sub>(ipa)(PPh<sub>3</sub>)] at t: 0 and 24h.**

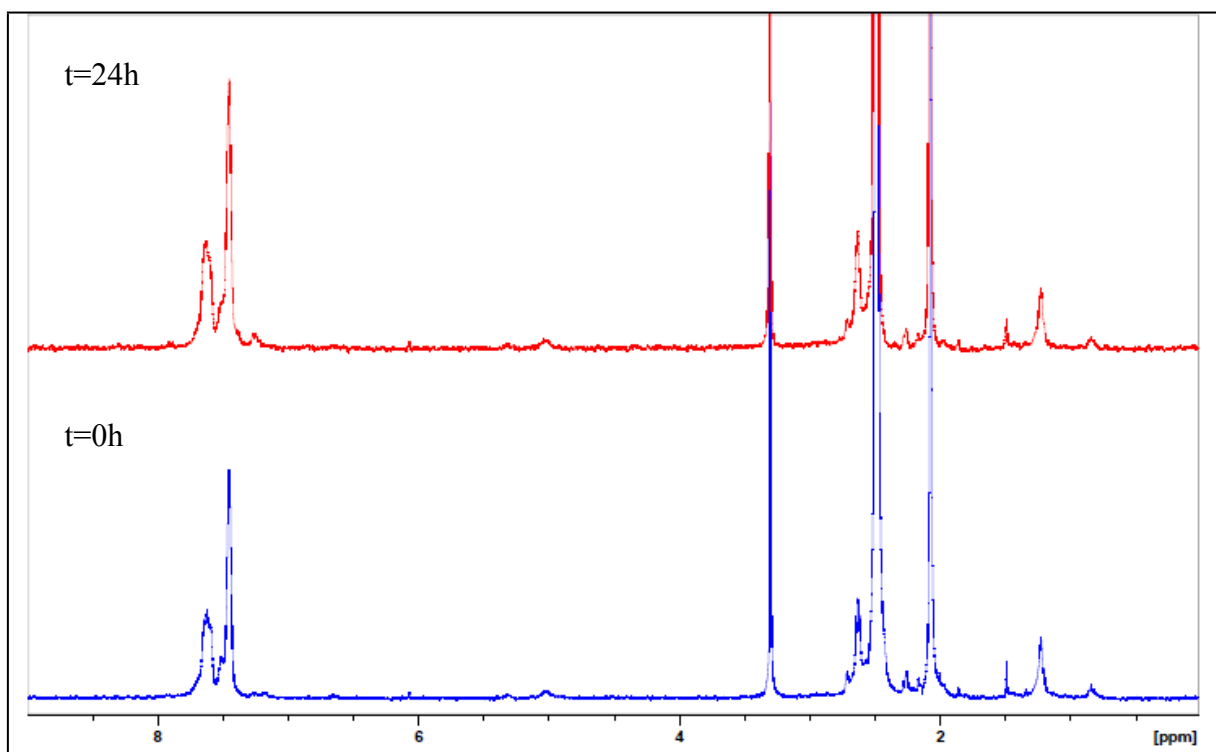

**Figure SM-A2. NMR spectra of the complex *trans*-[PtI<sub>2</sub>(dma)(PPh<sub>3</sub>)] at t: 0 and 24h.**

## B) NMR studies of 9EtG and the most active complex: 1.

### Experimental part of the binding studies of *trans*-[PtI<sub>2</sub>(amine)(PPh<sub>3</sub>)] with 9-EtG:

Samples of complex **1** were prepared by mixing 0.5 mL of complex solution (2 mg) in H<sub>2</sub>O:Acetone-d<sub>6</sub> (1:2) with 9-EtG (1 mg) into a NMR tube. The temperature of the tube was maintained at 37 °C with slight stirring during the entire experiment (24 hours). <sup>1</sup>H spectra were acquired at various times to monitor the reactivity.

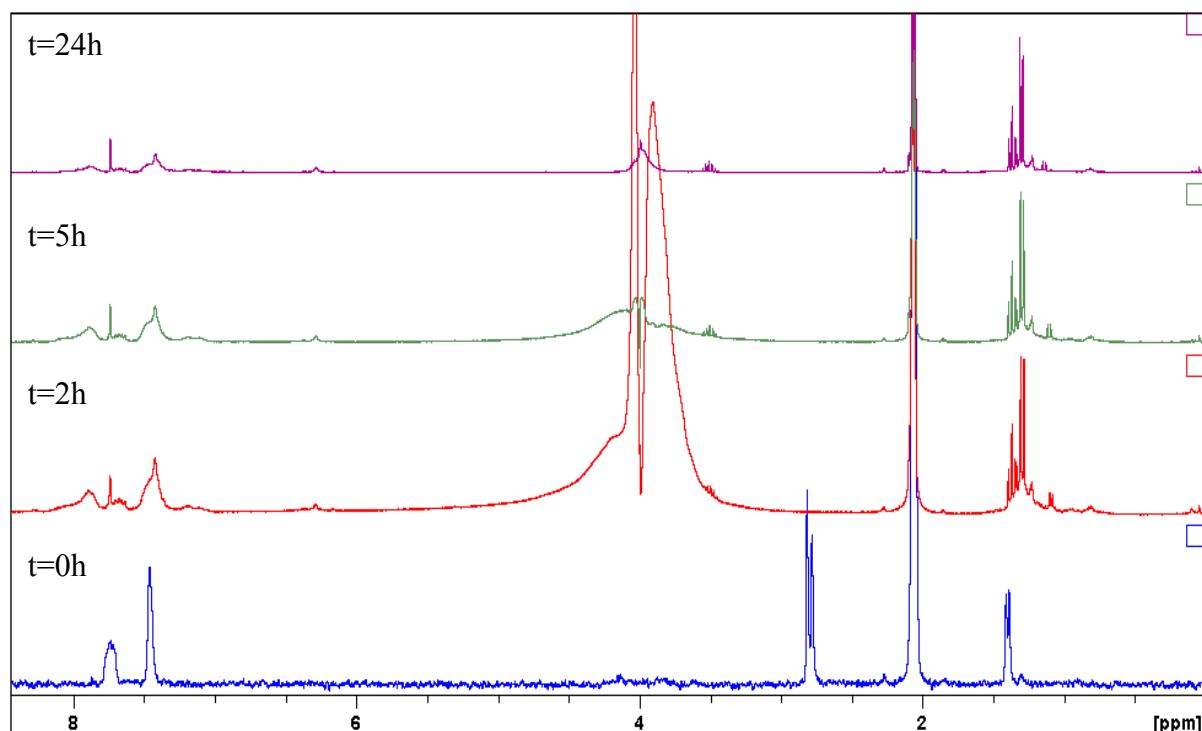

Figure SM-B1. NMR spectra of the complex *trans*-[PtI<sub>2</sub>(ipa)(PPh<sub>3</sub>)] at t: 0 and its monitoring reaction with 9EtG at t:2h, 5h and 24h.

### C) Single crystal data from *trans*-[PtI<sub>2</sub>(ipa)(PPh<sub>3</sub>)]:

A light orange prismatic-like specimen of C<sub>21</sub>H<sub>24</sub>I<sub>2</sub>NPt, approximate dimensions 0.10 mm x 0.19 mm x 0.22 mm, was used for the X-ray crystallographic analysis. The X-ray intensity data were measured. A total of 4079 frames were collected in a Bruker Kappa Apex II diffractometer using graphite-monochromated Mo-K $\alpha$  radiation ( $\lambda=0.71073$  Å) and operating at 50 kV and 30 mA. The total exposure time was 11.33 hours. The frames were integrated with the Bruker SAINT software package using a narrow-frame algorithm. The integration of the data using a triclinic unit cell yielded a total of 51025 reflections to a maximum  $\theta$  angle of 28.35° (0.75 Å resolution), of which 5847 were independent (average redundancy 8.727, completeness = 99.1%,  $R_{\text{int}} = 4.00\%$ ,  $R_{\text{sig}} = 2.28\%$ ) and 4953 (84.71%) were greater than  $2\sigma(F^2)$ . The final cell constants of  $a = 9.5189(7)$  Å,  $b = 10.9327(10)$  Å,  $c = 11.5197(10)$  Å,  $\alpha = 84.048(4)^\circ$ ,  $\beta = 81.976(4)^\circ$ ,  $\gamma = 86.335(4)^\circ$ , volume = 1179.20(17) Å<sup>3</sup>, are based upon the refinement of the XYZ-centroids of 9235 reflections above  $20 \sigma(I)$  with  $4.935^\circ < 2\theta < 55.65^\circ$ . Data were corrected for absorption effects using the multi-scan method (SADABS). The ratio of

minimum to maximum apparent transmission was 0.644. The calculated minimum and maximum transmission coefficients (based on crystal size) are 0.2523 and 0.4787. The structure was solved and refined using the Bruker SHELXTL Software Package, using the space group  $P -1$ , with  $Z = 2$  for the formula unit,  $C_{21}H_{24}I_2NPt$ . The final anisotropic full-matrix least-squares refinement on  $F^2$  with 237 variables converged at  $R_1 = 2.81\%$ , for the observed data and  $wR_2 = 11.29\%$  for all data. The goodness-of-fit was 1.000. The largest peak in the final difference electron density synthesis was  $1.103 e^{-}/\text{\AA}^3$  and the largest hole was  $-1.964 e^{-}/\text{\AA}^3$  with an RMS deviation of  $0.414 e^{-}/\text{\AA}^3$ . On the basis of the final model, the calculated density was  $2.169 \text{ g/cm}^3$  and  $F(000)$ , 712  $e^{-}$ .

**Table SM-C1. Sample and crystal data for *trans*-[PtI<sub>2</sub>(ipa)(PPh<sub>3</sub>)].**

|                        |                               |                            |
|------------------------|-------------------------------|----------------------------|
| Chemical formula       | $C_{21}H_{24}I_2NPt$          |                            |
| Formula weight         | 770.27                        |                            |
| Temperature            | 296(2) K                      |                            |
| Wavelength             | 0.71073 Å                     |                            |
| Crystal size           | 0.10 x 0.19 x 0.22 mm         |                            |
| Crystal habit          | light orange prismatic        |                            |
| Crystal system         | triclinic                     |                            |
| Space group            | $P -1$                        |                            |
| Unit cell dimensions   | $a = 9.5189(7) \text{ \AA}$   | $\alpha = 84.048(4)^\circ$ |
|                        | $b = 10.9327(10) \text{ \AA}$ | $\beta = 81.976(4)^\circ$  |
|                        | $c = 11.5197(10) \text{ \AA}$ | $\gamma = 86.335(4)^\circ$ |
| Volume                 | 1179.20(17) Å <sup>3</sup>    |                            |
| Z                      | 2                             |                            |
| Density (calculated)   | 2.169 Mg/cm <sup>3</sup>      |                            |
| Absorption coefficient | 8.641 mm <sup>-1</sup>        |                            |
| F(000)                 | 712                           |                            |

**Table SM-A2. Data collection and structure refinement for *trans*-[PtI<sub>2</sub>(ipa)(PPh<sub>3</sub>)].**

|                                     |                                          |                                  |
|-------------------------------------|------------------------------------------|----------------------------------|
| Theta range for data collection     | 1.79 to 28.35°                           |                                  |
| Index ranges                        | -12 ≤ h ≤ 12, -14 ≤ k ≤ 14, -15 ≤ l ≤ 15 |                                  |
| Reflections collected               | 51025                                    |                                  |
| Independent reflections             | 5847 [R(int) = 0.0400]                   |                                  |
| Coverage of independent reflections | 99.1%                                    |                                  |
| Absorption correction               | multi-scan                               |                                  |
| Max. and min. transmission          | 0.4787 and 0.2523                        |                                  |
| Structure solution technique        | direct methods                           |                                  |
| Structure solution program          | SHELXS-97 (Sheldrick, 2008)              |                                  |
| Refinement method                   | Full-matrix least-squares on $F^2$       |                                  |
| Refinement program                  | SHELXL-97 (Sheldrick, 2008)              |                                  |
| Function minimized                  | $\sum w(F_o^2 - F_c^2)^2$                |                                  |
| Data / restraints / parameters      | 5847 / 0 / 237                           |                                  |
| Goodness-of-fit on $F^2$            | 1.000                                    |                                  |
| $\Delta/\sigma_{\text{max}}$        | 0.001                                    |                                  |
| Final R indices                     | 4953 data;<br>I > 2σ(I)                  | $R_1 = 0.0281$ , $wR_2 = 0.0924$ |

**Weighting scheme** all data  $R_1 = 0.0394$ ,  $wR_2 = 0.1129$   
 $w=1/[\sigma^2(F_o^2)+(0.0827P)^2+0.3094P]$   
where  $P=(F_o^2+2F_c^2)/3$

**Largest diff. peak and hole** 1.103 and -1.964 eÅ<sup>-3</sup>

**R.M.S. deviation from mean** 0.414<sup>-3</sup>
